# Supplementary material for: Mycorrhizal Effects on Growth and Expressions of Stress-Responsive Genes (aquaporins and SOSs) of Tomato under Salt Stress
Source: MDPI journal article supplement (doi:10.3390/jof8121305), 2022-12-16
Supplement: s1 [file s1]

**Supplementary Material Table S1** Specific primer sequences of genes used for qRT-PCR.

| Gene names       | Accession number | Primer sequences (5'→3')                                     |
|------------------|------------------|--------------------------------------------------------------|
| <i>β-Actin</i>   | GQ339765         | F: GTCCTCTTCCAGCCATCCA<br>R: ACCACTGAGCACAATGTTACCG          |
| <i>SIPIP1;1</i>  | Solyc08g008050   | F: ACCATCAAATAATCATCAGAGCA<br>R: AGGATAAAATAAAAATTATTTTCAT   |
| <i>SIPIP1;2</i>  | Solyc01g094690   | F: TAGAGACTCCCATGTCCCTATTC<br>R: CTAGGCTTCTAGCAGGGTTAATG     |
| <i>SIPIP1;3</i>  | Solyc12g056220   | F: GGTGTTGTGAAGGGTTTTATGGTT<br>R: ACCCAGAAAATCCAGTGGTCATCC   |
| <i>SIPIP1;5</i>  | Solyc08g081190   | F: CTATCATCTACAACGACGAGCA<br>R: CATTGAAGGAGAACTTGAACA        |
| <i>SIPIP2;1</i>  | Solyc09g007770   | F: CACATTAACCCTGCTGTTACATTC<br>R: CAACCACAAATGGCTCCTAAAC     |
| <i>SIPIP2;4</i>  | Solyc06g011350   | F: ACGTACCCGTGTTGGCACCTCTTCC<br>R: ATGTTTCGTCCCACGCTTGTCCACC |
| <i>SIPIP2;6</i>  | Solyc11g069430   | F: TACTCCGCAAAGGATTACACTGAT<br>R: AGCCCAAGCAATACCAAGTAAACC   |
| <i>SIPIP2;8</i>  | Solyc01g111660   | F: ATTCCCATATCCCTGTGTTGGCTCC<br>R: AGCTGCAGCTCTCAAAATGTATTGG |
| <i>SIPIP2;9</i>  | Solyc10g055630   | F: TCTTCTCTGCTACTGACCCTAA<br>R: GTGGCCAAATGAACCATGAAA        |
| <i>SIPIP2;10</i> | Solyc09g007760   | F: CACATTAACCCTGCTGTTACATTC<br>R: CAACCACAAATGGCTCCTAAAC     |
| <i>SIPIP2;11</i> | Solyc02g083510   | F: GTCCTCTTCCAGCCATCCA<br>R: ACCACTGAGCACAATGTTACCG          |
| <i>SIPIP2;12</i> | Solyc05g055990   | F: ATACCCAACGTGTAGCATCACTCTC<br>R: CCAGCAGTGGAATACACGAGAACA  |
| <i>SITIP1;1</i>  | Solyc06g074820   | F: TCATCACTCCCCAACTTGTGCC<br>R: AAAGCCATAACCAGAACCCTGACCT    |
| <i>SITIP1;2</i>  | Solyc06g075650   | F: ATCCATAGCACATGCCTTTGCCCTT<br>R: CCGATGTTTCCAGTCCACCAGTAG  |
| <i>SITIP1;3</i>  | Solyc10g083880   | F: CTATTCGTAGCGGTTTCGGTTG<br>R: TTGTTCCCAAACCTACCCTTCTT      |
| <i>SITIP2;1</i>  | Solyc12g044330   | F: TGACTGGAGGAATGGCGGTT<br>R: ACCACAGCGGGTCCAAATGA           |
| <i>SITIP2;2</i>  | Solyc03g120470   | F: GATTCATTCAGCGTTGTCTCTCTT<br>R: AAACGGCTACGAATAGAGCAAATC   |
| <i>SITIP2;3</i>  | Solyc06g060760   | F: AATGGTGAAGATTGCCTTTGGTAG<br>R: TCAAATGTCCACCTGAGATGTTAG   |
| <i>SITIP3;2</i>  | Solyc03g019820   | F: GCTGATTTATTGGTGTTATGGCTATG<br>R: AGCAAGAACAGAGCCTTCACCG   |
| <i>SITIP4;1</i>  | Solyc08g066840   | F: TTATTCGTAAAATCAGTTTCATCA<br>R: CAAGCAGCAACAGAAGCAAGTAAT   |

|               |          |                                                      |
|---------------|----------|------------------------------------------------------|
| <i>SISOS1</i> | AJ717346 | F: GTGCAGTACAGATGCTTTTACTTG<br>R: AGGGCCACAACAGCCACA |
| <i>SISOS2</i> | AJ717348 | F: ATTTCCCGCCAACCTGCTAA<br>R: TGCCGTTACCCCCTCAATTC   |

---
